# Supplementary material for: Association between sleep disturbance in Alzheimer’s disease patients and burden on and health status of their caregivers
Source: PubMed Central journal article supplement (PMC6517338; doi:10.1007/s00415-019-09286-0), 2019-04-09
Supplement: 415_2019_9286_MOESM1_ESM.pdf [file 415_2019_9286_MOESM1_ESM.pdf]

Article title:

Association between sleep disturbance in Alzheimer's disease patients and burden on and health status of their caregivers

Journal name:

Journal of Neurology

Authors:

Shoki Okuda (1), Jumpei Tetsuka (1), Kenichi Takahashi (2), Yasuo Toda (1), Takekazu Kubo (1), Shigeru Tokita (1)

Author affiliations and addresses:

(1) Medical Affairs, MSD K.K., Kitanomaru Square, 1-13-12 Kudan-kita, Chiyoda-ku, Tokyo 102-8667, Japan

(2) Japan Development, MSD K.K., Kitanomaru Square, 1-13-12 Kudan-kita, Chiyoda-ku, Tokyo 102-8667, Japan

Corresponding author:

Shoki Okuda

Email: [shoki.okuda@merck.com](mailto:shoki.okuda@merck.com)

Table I Association of SDI with BIC-11 in a multiple linear regression model<sup>a</sup>

| Variable  |                                                   | Coefficient (95% CI) | <i>p</i> value    |
|-----------|---------------------------------------------------|----------------------|-------------------|
| Patient   | SDI                                               | 1.18 (0.80, 1.56)    | <0.001            |
|           | Sex                                               | Female (reference)   |                   |
|           |                                                   | Male                 | 1.99 (0.46, 3.52) |
|           | NPI-Q                                             | 0.26 (0.14, 0.39)    | <0.001            |
| Caregiver | Time spent on<br>caregiving at<br>night by family |                      |                   |
|           |                                                   | 0.05 (0.01, 0.09)    | 0.010             |
|           | Number of<br>caregivers                           | Multiple (reference) |                   |
| Single    |                                                   | 1.20 (-0.19, 2.60)   | 0.091             |

BIC-11, Burden Index of Caregivers-11; CI, confidence interval; NPI-Q, Neuropsychiatric Inventory-Brief Questionnaire Form; SDI, Sleep Disorders Inventory.

<sup>a</sup> Confounding factors except for SDI were selected in a stepwise manner.

Table II Association of SDI with BIC-11 sub-domains in a multiple linear regression model<sup>a</sup>

| Variable                     |                                             |                              | Coefficient (95% CI) | <i>p</i> value |
|------------------------------|---------------------------------------------|------------------------------|----------------------|----------------|
| <b>Time-dependent burden</b> |                                             |                              |                      |                |
| Patient                      | SDI                                         |                              | 0.26 (0.19, 0.33)    | <0.001         |
|                              | Severity of AD                              | Mild (reference)             |                      |                |
|                              |                                             | Moderate                     | 0.74 (0.41, 1.06)    | <0.001         |
| Caregiver                    | Number of caregivers                        | Multiple (reference)         |                      |                |
|                              |                                             | Single                       | 0.41 (0.10, 0.72)    | 0.009          |
| <b>Emotional burden</b>      |                                             |                              |                      |                |
| Patient                      | SDI                                         |                              | 0.18 (0.09, 0.28)    | <0.001         |
|                              | Sex                                         | Female (reference)           |                      |                |
|                              |                                             | Male                         | 0.32 (-0.06, 0.69)   | 0.097          |
|                              | NPI-Q                                       |                              | 0.05 (0.02, 0.08)    | 0.001          |
| Caregiver                    | Time spent on caregiving at night by family |                              | 0.01 (0.00, 0.02)    | 0.060          |
| <b>Existential burden</b>    |                                             |                              |                      |                |
| Patient                      | SDI                                         |                              | 0.17 (0.08, 0.26)    | <0.001         |
|                              | Sex                                         | Female (reference)           |                      |                |
|                              |                                             | Male                         | 0.37 (-0.01, 0.75)   | 0.054          |
|                              | AD treatment drugs                          | No (reference)               |                      |                |
|                              |                                             | Yes                          | -0.44 (-0.84, -0.05) | 0.028          |
|                              |                                             | Do not know                  | -0.88 (-2.08, 0.32)  | 0.151          |
|                              | NPI-Q                                       |                              | 0.06 (0.03, 0.09)    | <0.001         |
| Caregiver                    | Job status                                  | Company employee (reference) |                      |                |
|                              |                                             | Public servant               | -0.63 (-1.53, 0.28)  | 0.172          |
|                              |                                             | Management/executive         | -1.33 (-2.21, -0.45) | 0.003          |
|                              |                                             | Self-employed                | 0.08 (-0.55, 0.71)   | 0.804          |
|                              |                                             | Freelance                    | 0.04 (-1.01, 1.09)   | 0.938          |
|                              |                                             | Homemaker                    | -0.35 (-0.83, 0.14)  | 0.161          |
|                              |                                             | Part-timer                   | -0.42 (-0.97, 0.13)  | 0.134          |
|                              |                                             | Other                        | -0.64 (-1.65, 0.37)  | 0.215          |

|                               |                                             |                          |                      |        |
|-------------------------------|---------------------------------------------|--------------------------|----------------------|--------|
|                               |                                             | Not employed             | -0.61 (-1.19, -0.04) | 0.037  |
|                               | Time spent on caregiving at night by family |                          | 0.01 (0.00, 0.02)    | 0.066  |
| <b>Physical burden</b>        |                                             |                          |                      |        |
| Patient                       | SDI                                         |                          | 0.25 (0.16, 0.35)    | <0.001 |
|                               | Sex                                         | Female (reference)       |                      |        |
|                               |                                             | Male                     | 0.67 (0.29, 1.04)    | 0.001  |
|                               | Sleeping medication                         | No (reference)           |                      |        |
|                               |                                             | Yes                      | 0.67 (0.31, 1.04)    | <0.001 |
|                               |                                             | Do not know              | -0.13 (-1.73, 1.47)  | 0.874  |
|                               | AD treatment drugs                          | No (reference)           |                      |        |
|                               |                                             | Yes                      | -0.53 (-0.93, -0.12) | 0.011  |
|                               |                                             | Do not know              | -0.62 (-1.88, 0.64)  | 0.332  |
|                               | NPI-Q                                       |                          | 0.04 (0.01, 0.07)    | 0.016  |
| Caregiver                     | Time spent by paid caregivers               |                          | -0.01 (-0.01, 0.00)  | 0.055  |
|                               | Time spent on caregiving at night by family |                          | 0.02 (0.01, 0.03)    | 0.001  |
|                               | Number of caregivers                        | Multiple (reference)     |                      |        |
|                               |                                             | Single                   | 0.32 (-0.03, 0.66)   | 0.070  |
| <b>Service-related burden</b> |                                             |                          |                      |        |
| Patient                       | SDI                                         |                          | 0.24 (0.14, 0.33)    | <0.001 |
|                               | Sex                                         | Female (reference)       |                      |        |
|                               |                                             | Male                     | 0.57 (0.20, 0.93)    | 0.002  |
|                               | NPI-Q                                       |                          | 0.06 (0.03, 0.09)    | <0.001 |
| <b>Total care burden</b>      |                                             |                          |                      |        |
| Patient                       | SDI                                         |                          | 0.11 (0.06, 0.16)    | <0.001 |
|                               | NPI-Q                                       |                          | 0.04 (0.03, 0.06)    | <0.001 |
| Caregiver                     | Relationship to the patient                 | Husband/wife (reference) |                      |        |
|                               |                                             | Son/daughter             | 0.03 (-0.36, 0.42)   | 0.884  |
|                               |                                             | Grandchild               | -0.27 (-0.83, 0.28)  | 0.336  |
|                               |                                             | Son-in-law/daughter-     | -0.09 (-0.69, 0.52)  | 0.778  |

in-low

Others

-0.46 (-0.96, 0.05)

0.075

---

AD, Alzheimer's disease; BIC-11, Burden Index of Caregivers-11; CI, confidence interval; NPI-Q, Neuropsychiatric Inventory-Brief Questionnaire Form; SDI, Sleep Disorders Inventory.

<sup>a</sup> Confounding factors except for SDI were selected in a stepwise manner.

Table III Association of SDI with PSQI in a multiple linear regression model<sup>a</sup>

| Variable  |                      |                      | Coefficient (95% CI) | <i>p</i> value |
|-----------|----------------------|----------------------|----------------------|----------------|
| Patient   | SDI                  |                      | 0.62 (0.46, 0.78)    | <0.001         |
|           | Sleeping medication  | No (reference)       |                      |                |
|           |                      | Yes                  | 1.12 (0.52, 1.71)    | <0.001         |
|           |                      | Do not know          | 2.23 (-0.55, 5.02)   | 0.116          |
|           | AD treatment drugs   | No (reference)       |                      |                |
|           |                      | Yes                  | -0.99 (-1.65, -0.32) | 0.004          |
|           |                      | Do not know          | -1.23 (-3.37, 0.90)  | 0.258          |
|           | NPI-Q                |                      | 0.08 (0.03, 0.13)    | 0.002          |
| Caregiver | Number of caregivers | Multiple (reference) |                      |                |
|           |                      | Single               | 0.57 (0.01, 1.14)    | 0.047          |

AD, Alzheimer's disease; CI, confidence interval; NPI-Q, Neuropsychiatric Inventory-Brief Questionnaire Form; PSQI, Pittsburgh Sleep Quality Index; SDI, Sleep Disorders Inventory.

<sup>a</sup> Confounding factors except for SDI were selected in a stepwise manner.

Table IV Association of SDI with PHQ-9 in a multiple linear regression model<sup>a</sup>

| Variable     |                     |                              | Coefficient (95% CI) | <i>p</i> value |
|--------------|---------------------|------------------------------|----------------------|----------------|
| Patient      | SDI                 |                              | 1.03 (0.77, 1.29)    | <0.001         |
|              | Sex                 | Female (reference)           |                      |                |
|              |                     | Male                         | 1.25 (0.18, 2.32)    | 0.023          |
|              | AD treatment drugs  | No (reference)               |                      |                |
|              |                     | Yes                          | -1.68 (-2.80, -0.56) | 0.003          |
|              |                     | Do not know                  | -2.94 (-6.34, 0.45)  | 0.089          |
| NPI-Q        |                     | 0.21 (0.12, 0.29)            | <0.001               |                |
| Caregiver    | Sex                 | Female (reference)           |                      |                |
|              |                     | Male                         | -1.09 (-2.16, -0.02) | 0.046          |
|              | Age                 |                              | -0.05 (-0.09, 0.00)  | 0.034          |
|              | Job status          | Company employee (reference) |                      |                |
|              |                     | Public servant               | -1.76 (-4.32, 0.79)  | 0.176          |
|              |                     | Management/executive         | -0.72 (-3.19, 1.76)  | 0.570          |
|              |                     | Self-employed                | 1.52 (-0.32, 3.36)   | 0.105          |
|              |                     | Freelance                    | 1.92 (-1.05, 4.89)   | 0.204          |
|              |                     | Homemaker                    | -2.30 (-3.82, -0.78) | 0.003          |
|              |                     | Part-timer                   | -1.31 (-2.93, 0.31)  | 0.112          |
| Other        |                     | -1.57 (-4.44, 1.30)          | 0.284                |                |
| Not employed | -0.05 (-1.76, 1.67) | 0.956                        |                      |                |

AD, Alzheimer's disease; CI, confidence interval; NPI-Q, Neuropsychiatric Inventory-Brief Questionnaire Form; PHQ-9, Patient Health Questionnaire-9; SDI, Sleep Disorders Inventory.

<sup>a</sup> Confounding factors except for SDI were selected in a stepwise manner.

Table V Association of SDI with PHQ-9 (point  $\geq 10$ ) in a multiple logistic regression model<sup>a</sup>

| Variable     |                    | Odds ratio (95% CI)          | <i>p</i> value    |       |
|--------------|--------------------|------------------------------|-------------------|-------|
| Patient      | SDI                | 1.35 (1.20, 1.54)            | <0.001            |       |
|              | Sex                | Female (reference)           |                   |       |
|              |                    | Male                         | 1.72 (1.08, 2.73) | 0.023 |
|              | AD treatment drugs | No (reference)               |                   |       |
|              |                    | Yes                          | 0.57 (0.35, 0.94) | 0.027 |
|              |                    | Do not know                  | 0.37 (0.07, 2.04) | 0.254 |
| NPI-Q        | 1.08 (1.04, 1.12)  | <0.001                       |                   |       |
| Caregiver    | Age                | 0.97 (0.95, 0.99)            | 0.003             |       |
|              | Job status         | Company employee (reference) |                   |       |
|              |                    | Public servant               | 0.32 (0.09, 1.07) | 0.065 |
|              |                    | Management/executive         | 0.78 (0.26, 2.31) | 0.650 |
|              |                    | Self-employed                | 1.42 (0.63, 3.16) | 0.395 |
|              |                    | Freelance                    | 1.16 (0.31, 4.43) | 0.824 |
|              |                    | Homemaker                    | 0.49 (0.25, 0.94) | 0.033 |
|              |                    | Part-timer                   | 0.77 (0.39, 1.54) | 0.459 |
|              |                    | Other                        | 0.18 (0.04, 0.90) | 0.036 |
| Not employed | 1.31 (0.61, 2.78)  | 0.489                        |                   |       |

AD, Alzheimer's disease; CI, confidence interval; NPI-Q, Neuropsychiatric Inventory-Brief Questionnaire Form; PHQ-9, Patient Health Questionnaire-9; SDI, Sleep Disorders Inventory.

<sup>a</sup> Confounding factors except for SDI were selected in a stepwise manner.



Table VI Association of SDI with SF-12v2 in a multiple linear regression model<sup>a</sup>

| Variable                          |                                             | Coefficient (95% CI)         | <i>p</i> value              |
|-----------------------------------|---------------------------------------------|------------------------------|-----------------------------|
| <b>Physical component summary</b> |                                             |                              |                             |
| Patient                           | SDI                                         | -1.30 (-1.84, -0.77)         | <0.001                      |
|                                   | Sex                                         | Female (reference)           |                             |
|                                   |                                             | Male                         | -2.70 (-5.22, -0.18) 0.035  |
|                                   | Sleeping medication                         | No (reference)               |                             |
|                                   |                                             | Yes                          | -3.81 (-6.21, -1.41) 0.002  |
|                                   |                                             | Do not know                  | 1.90 (-8.41, 12.20) 0.718   |
| Caregiver                         | Age                                         | -0.10 (-0.20, -0.01)         | 0.030                       |
|                                   | Time spent by paid caregivers               | 0.04 (0.01, 0.08)            | 0.025                       |
|                                   | Time spent on caregiving at night by family | -0.09 (-0.16, -0.03)         | 0.003                       |
| <b>Mental component summary</b>   |                                             |                              |                             |
| Patient                           | SDI                                         | -0.84 (-1.26, -0.43)         | <0.001                      |
| Caregiver                         | Job status                                  | Company employee (reference) |                             |
|                                   |                                             | Public servant               | 5.28 (0.48, 10.08) 0.031    |
|                                   |                                             | Management/executive         | 2.60 (-2.06, 7.27) 0.273    |
|                                   |                                             | Self-employed                | -3.61 (-6.95, -0.28) 0.034  |
|                                   |                                             | Freelance                    | -1.31 (-6.88, 4.26) 0.644   |
|                                   |                                             | Homemaker                    | -1.27 (-3.84, 1.29) 0.329   |
|                                   |                                             | Part-timer                   | -1.42 (-4.29, 1.45) 0.333   |
|                                   |                                             | Other                        | -1.88 (-7.25, 3.49) 0.491   |
|                                   |                                             | Not employed                 | -5.44 (-8.45, -2.43) <0.001 |

CI, confidence interval; SDI, Sleep Disorders Inventory; SF12 v2, 12-Item Short Form Health Survey v2.

<sup>a</sup> Confounding factors except for SDI were selected in a stepwise manner.
